# Supplementary material
Source: PubMed Central journal article supplement (PMC11072754)
Supplement: 18_2021_4005_MOESM1_ESM.pdf [file 18_2021_4005_MOESM1_ESM.pdf]

# Supplementary Information

Figures S1 – S4

Carbon dioxide inhibits COVID-19-type proinflammatory responses through extracellular  
signal-regulated kinases 1 and 2, novel carbon dioxide sensors

## Cellular and Molecular Life Sciences

Hanna Galganska<sup>a</sup>, Wiesława Jarmuszkiewicz<sup>b\*</sup> and Lukasz Galganski<sup>b\*</sup>

<sup>a</sup> Molecular Biology Techniques Laboratory, Faculty of Biology, Adam Mickiewicz University, Uniwersytetu  
Poznanskiego 6, 61-614 Poznan, Poland

<sup>b</sup> Laboratory of Mitochondrial Biochemistry, Department of Bioenergetics, Faculty of Biology,  
Adam Mickiewicz University, Uniwersytetu Poznanskiego 6, 61-614 Poznan, Poland

\* Correspondence to: [wieslawa.jarmuszkiewicz@amu.edu.pl](mailto:wieslawa.jarmuszkiewicz@amu.edu.pl)

\* Correspondence to: [lukasz.galganski@amu.edu.pl](mailto:lukasz.galganski@amu.edu.pl)

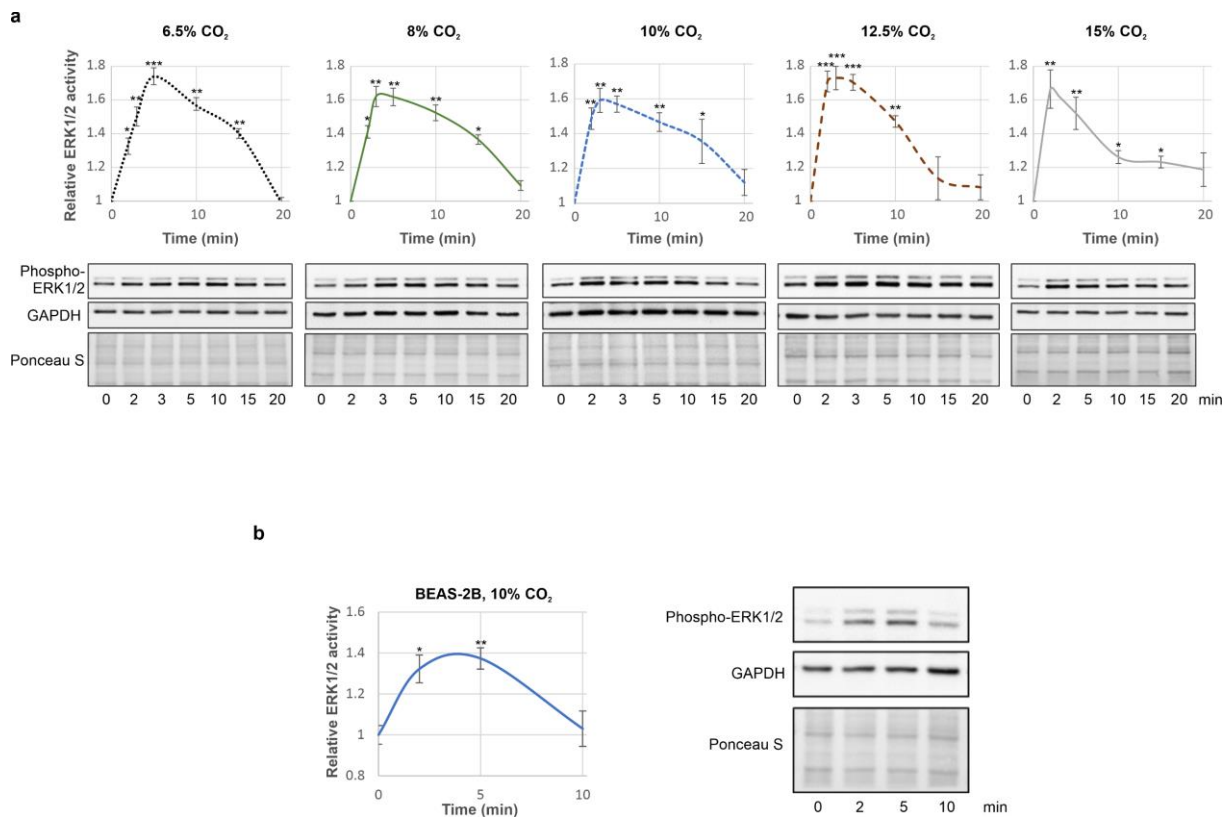

**Fig. S1** Data supporting CO<sub>2</sub>-induced ERK1/2 activation. **a** Transient activation of ERK1/2 by CO<sub>2</sub> at different concentrations in ECs. **b** Regulation of ERK1/2 activity over time in response to 10% CO<sub>2</sub> in BEAS-2B cells. ERK1/2 activity was evaluated using immunoblotting with an anti-phospho-ERK1/2 antibody, and protein loading was assessed using Ponceau S staining and immunoblotting with anti-GAPDH and anti-ERK1/2 antibodies. The results of three independent experiments are presented as the mean  $\pm$  SD. \*, \*\* and \*\*\* indicate significant differences in MAPK activity ( $p < 0.05$ ,  $p < 0.01$  and  $p < 0.001$ , respectively) compared to the 0-min time point

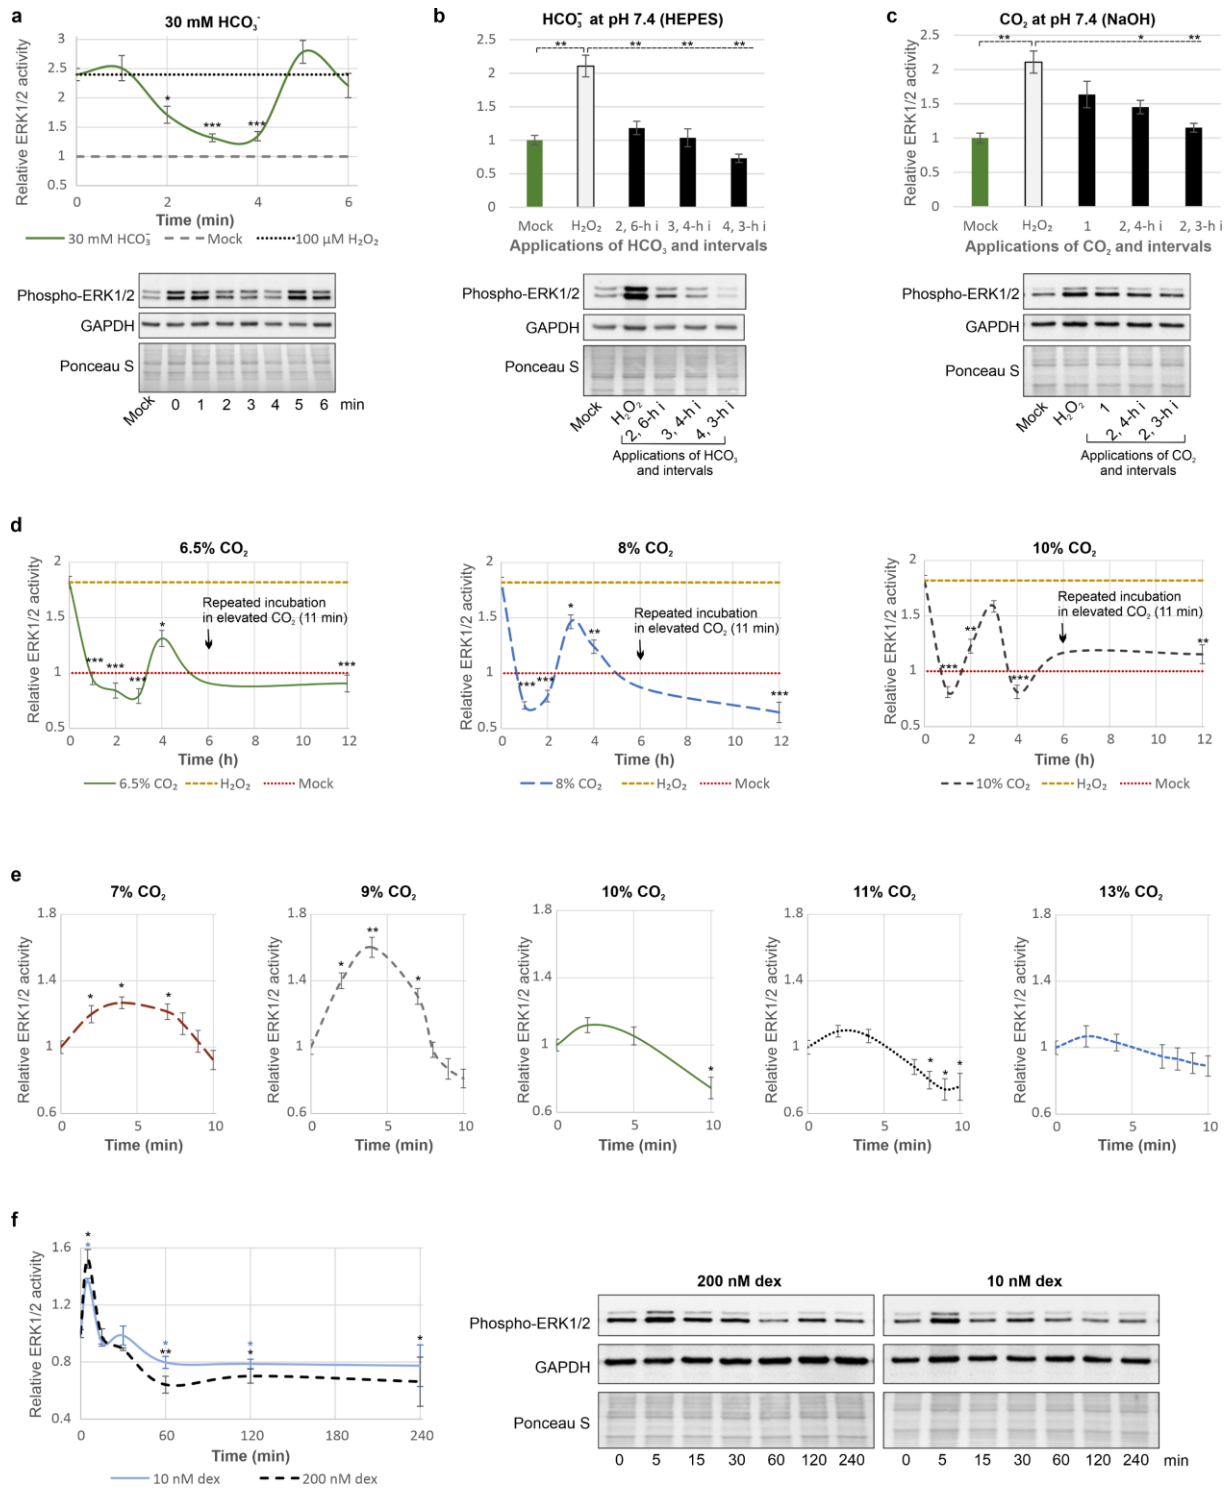

**Fig. S2** ERK1/2 activated by 100 μM H<sub>2</sub>O<sub>2</sub> are inhibited by both HCO<sub>3</sub><sup>-</sup> and CO<sub>2</sub> in ECs. **a** At 30 mM, NaHCO<sub>3</sub> transiently inhibited ERK1/2. **b** Repeated treatments, i.e. 2, 3 or 4 incubations as indicated, with 15 mM HCO<sub>3</sub><sup>-</sup> buffered with HEPES (pH 7.4) inactivated ERK1/2; i – interval between applications. **c** Neutralised 15 mM CO<sub>2</sub> (cell culture medium containing 14 mM NaOH) was bubbled with carbon dioxide until the pH reached 7.4) inactivated ERK1/2.

This effect was enhanced by additional CO<sub>2</sub> applications. **d** Inhibition of ERK1/2 was triggered by 11-min incubations with CO<sub>2</sub> at the indicated concentrations. **e** Time course of H<sub>2</sub>O<sub>2</sub>-induced ERK1/2 activity in response to CO<sub>2</sub> at the indicated levels. **f** Time course of ERK1/2 activity in response to 10 and 200 nM dex in ECs. In **a–f**, ERK1/2 activity was assessed by immunoblotting with an anti-phospho-ERK1/2 antibody. Protein loading was visualised by Ponceau S staining and immunoblotting with an anti-GAPDH antibody

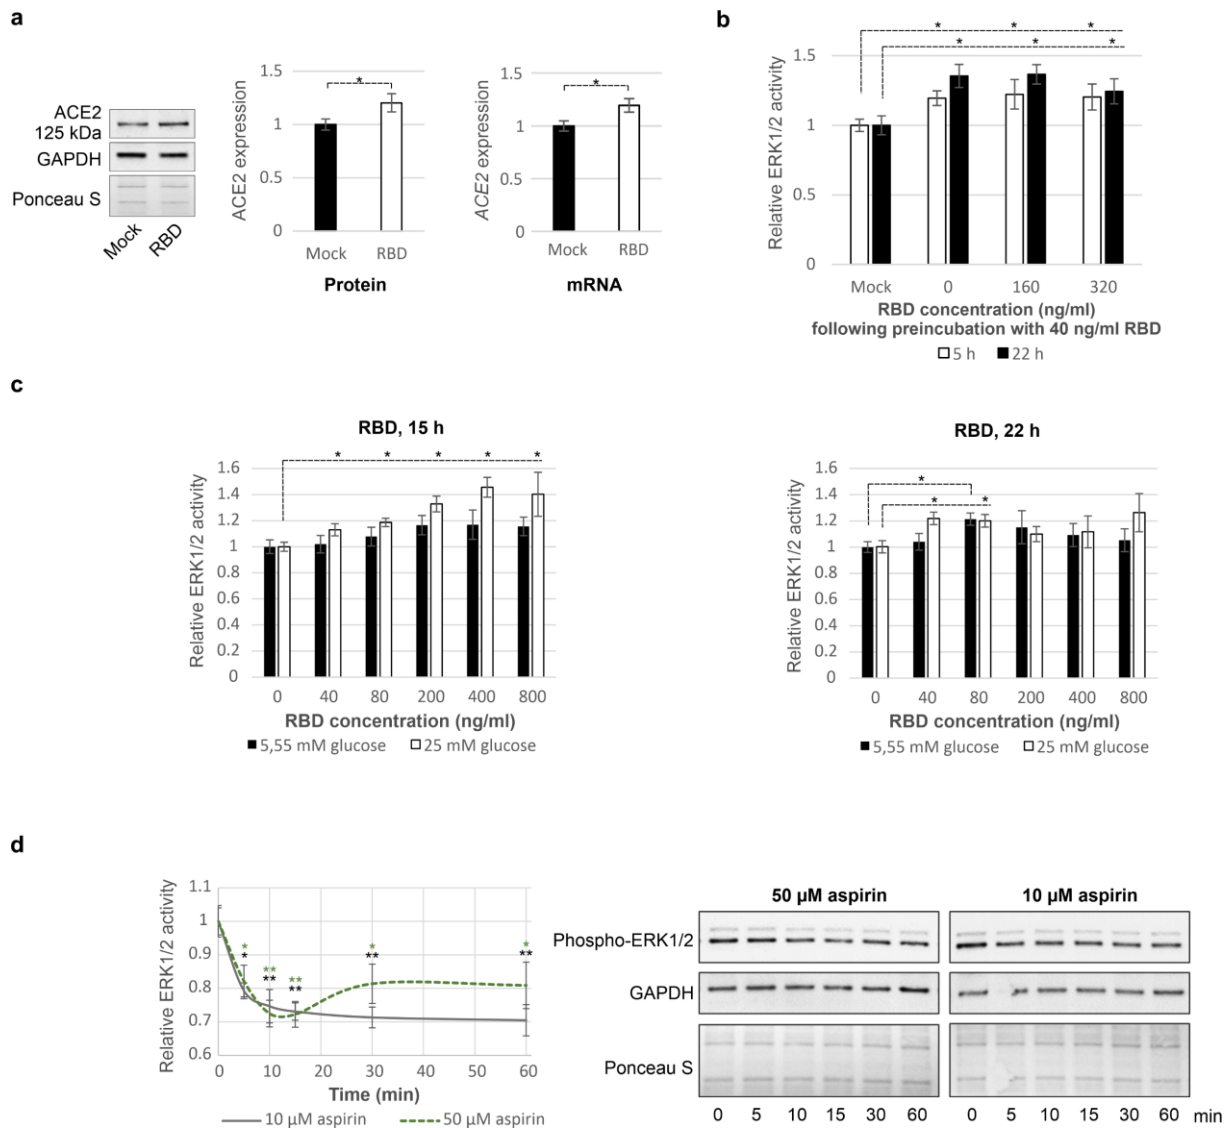

**Fig. S3** Experiments supporting RBD-dependent activation of ERK1/2 in ECs.

**a** Expression of ACE2 in ECs was induced in response to treatment with 40 ng/ml RBD for 24 h. Immunoblotting was performed with anti-ACE2 and anti-GAPDH antibodies. *ACE2* mRNA levels were determined by RT-qPCR with *GAPDH* and *ACTB* as normalization controls. Data from three independent experiments; three technical replicates per experiment. **b** ERK1/2 activity was increased under conditions designed to mimic an increase or decrease in the amount of SARS-CoV-2 over time, i.e. initial incubation with 40 ng/ml RBD for 15 h followed by a change in the RBD concentration (0, 160, 320 ng/ml) and further incubation for 5 or 22 h. Both an increase in concentration and the removal of RBD maintained ERK1/2 activation, unlike the absence of RBD. **c** Effect of glucose concentration on ERK1/2 activation by RBD at the indicated concentrations. **d** Time course of ERK1/2 inactivation by 10 and 50  $\mu$ M aspirin. In **b–d** ERK1/2 activity was determined by immunoblotting with an anti-phospho-ERK1/2

antibody, and protein loading was assessed by Ponceau S staining and immunoblotting with anti-GAPDH and anti-ERK1/2 antibodies

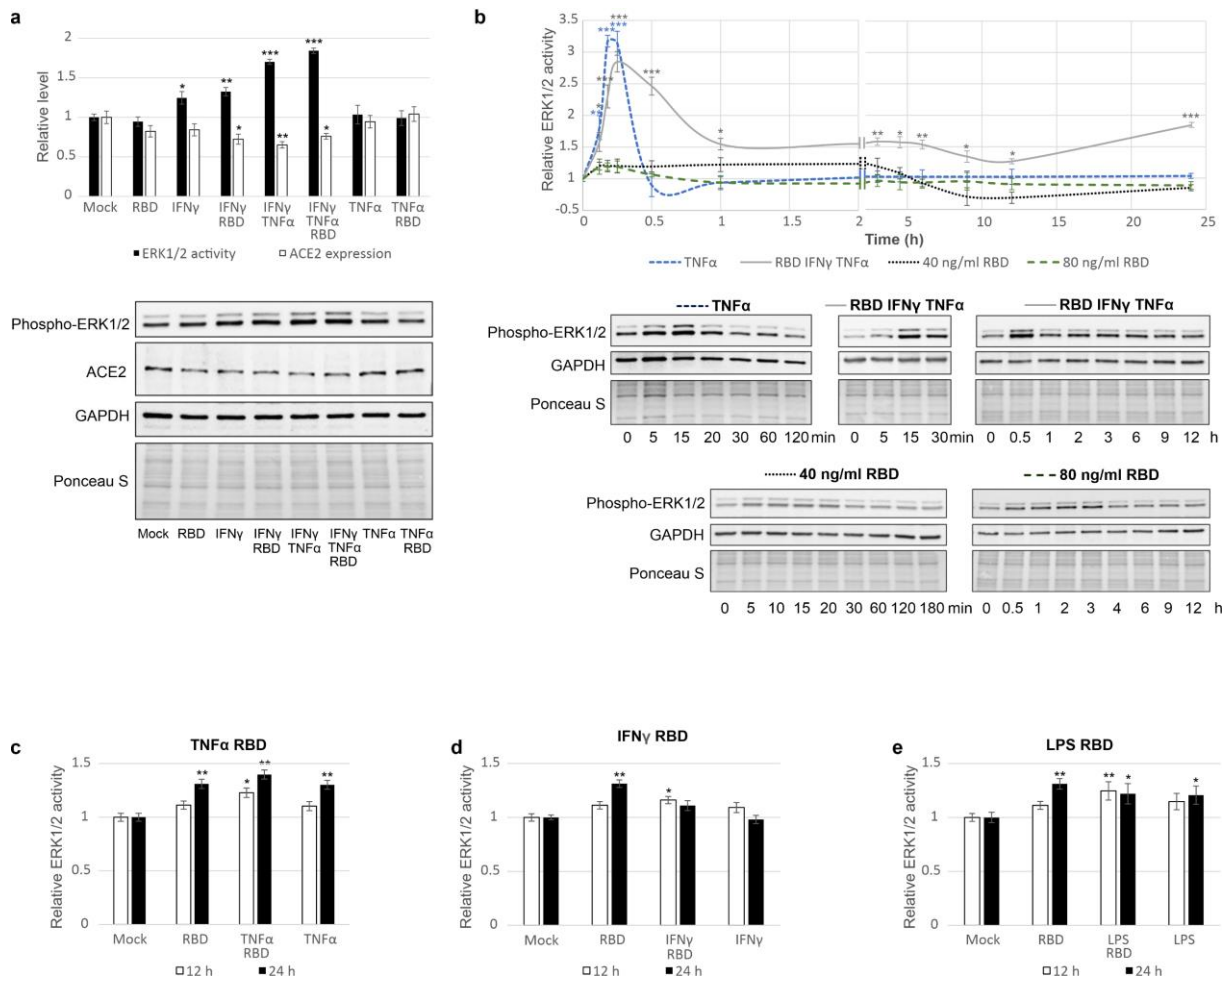

**Fig. S4** Effects of proinflammatory cytokines on RBD-induced ERK1/2 activation. **a** RBD and proinflammatory cytokines regulate ERK1/2 activity and ACE2 expression in BEAS-2B cells. Cells were treated with the indicated proteins for 24 h. **b** Time course of ERK1/2 activity in response to RBD, TNF $\alpha$  or the combination of RBD, TNF $\alpha$  and IFN $\gamma$  in BEAS-2B cells. **c–e** Effect of TNF $\alpha$  (**c**), IFN $\gamma$  (**d**) and LPS (**e**) combined with 40 ng/ml RBD on ERK1/2 in ECs. In **a–e**, ERK1/2 activity was measured by immunoblotting with an anti-phospho-ERK1/2 antibody. Protein loading was visualised by Ponceau S and immunoblotting with an anti-GAPDH antibody. ACE2 expression in **a** was measured with an anti-ACE2 antibody
